# Supplementary material
Source: PubMed Central journal article supplement (PMC10313746)
Supplement: NIHMS1877755-supplement-Supplementary_file_Stroke_incidence_meta-analysis.pdf [file NIHMS1877755-supplement-Supplementary_file_Stroke_incidence_meta-analysis.pdf]

Supplementary Table 1. A summary of the methodological quality of included studies according to the Newcastle Ottawa scale for observational studies

| <u>Study</u><br>Author Year | <u>Selection</u><br>Representativeness of the exposed cohort                                                                                                             | <u>Selection</u><br>Selection of the non-exposed cohort | <u>Selection</u><br>Ascertainment of exposure | <u>Selection</u><br>Demonstration that outcome of interest was not present at start of study | <u>Comparability</u><br>Comparability of cohorts on the basis of the design or analysis | <u>Outcome</u><br>Assessment of outcome | <u>Outcome</u><br>Was follow-up long enough for outcomes to occur | <u>Outcome</u><br>Adequacy of follow-up of cohorts |
|-----------------------------|--------------------------------------------------------------------------------------------------------------------------------------------------------------------------|---------------------------------------------------------|-----------------------------------------------|----------------------------------------------------------------------------------------------|-----------------------------------------------------------------------------------------|-----------------------------------------|-------------------------------------------------------------------|----------------------------------------------------|
| Ashok et al. 1986           | B) Somewhat representative of the average population of Benghazi, Libya (females and stroke patients unable to attend polyclinics or hospitals may be underrepresented)* | A) Drawn from the same community*                       | A) Secure records*                            | A) Yes*                                                                                      | A) Study reports age and sex*<br><br>B) Study reports types of stroke and risk factors  | A) Independent assessment*              | A) Yes (1 year)*                                                  | D) No statement                                    |

|                       |                                                                                                                                                                          |                                   |                                                                                                           |         |                                                                                   |                            |                   |                                                                                                   |
|-----------------------|--------------------------------------------------------------------------------------------------------------------------------------------------------------------------|-----------------------------------|-----------------------------------------------------------------------------------------------------------|---------|-----------------------------------------------------------------------------------|----------------------------|-------------------|---------------------------------------------------------------------------------------------------|
| Damasceno et al. 2010 | B) Somewhat representative of Maputo, Mozambique*                                                                                                                        | A) Drawn from the same community* | A) Secure records (STEPS questionnaire, medical records, CT scan images, necropsy reports, self-reports)* | A) Yes* | A) Study reports age and sex*<br>B) Study reports type of stroke and risk factors | A) Independent assessment* | A) Yes (1 year)*  | B) Subjects lost to follow-up unlikely to introduce bias - small number lost 22 (4%)*             |
| Danesi et al. 2013    | A) Truly representative of the average population Surulere Local Government Area (LGA), Lagos State, Nigeria*                                                            | A) Drawn from the same community* | A) Secure records (confirmed by study neurologist)*                                                       | A) Yes* | A) Study reports age and sex*                                                     | A) Independent assessment* | A) Yes (1 year)*  | B) Subjects lost to follow-up unlikely to introduce bias - small number not followed up 29 (15%)* |
| Zunni et al. 1995     | B) Somewhat representative of the average population of Benghazi, Libya (females and stroke patients unable to attend polyclinics or hospitals may be underrepresented)* | A) Drawn from the same community* | A) Secure records*                                                                                        | A) Yes* | A) Study reports age and sex*<br>B) Study reports type of stroke and risk factors | A) Independent assessment* | A) Yes (3 years)* | D) No statement                                                                                   |

|                        |                                                                                                                                                 |                                   |                                                                      |         |                                                                                                         |                            |                   |                                                                                                    |
|------------------------|-------------------------------------------------------------------------------------------------------------------------------------------------|-----------------------------------|----------------------------------------------------------------------|---------|---------------------------------------------------------------------------------------------------------|----------------------------|-------------------|----------------------------------------------------------------------------------------------------|
| El-Tallawy et al. 2013 | A) Truly representative of the average population of Al Quseir city, Red Sea Governorate, Egypt*                                                | A) Drawn from the same community* | B) Structured interview (door to door survey by three neurologists)* | A) Yes* | A) Study reports age and sex*<br>B) Study reports type of stroke                                        | A) Independent assessment* | A) Yes (1 year)*  | A) Complete follow-up - all subjects - accounted for*                                              |
| Farghaly et al. 2013   | A) Truly representative of the average population of Al-Kharga District, New Valley Governorate, Egypt*                                         | A) Drawn from the same community* | B) Structured interview (door to door survey by three neurologists)* | A) Yes* | A) Study reports age and sex*<br>B) Study reports stroke type, urban and rural locations                | A) Independent assessment* | A) Yes (3 years)* | D) No statement                                                                                    |
| Gomes et al. 2013      | B) Somewhat representative of the average population of Maputo, Mozambique (stroke patients unable to attend hospital may be underrepresented)* | A) Drawn from the same community* | A) Secure records (CT scan or autopsy)*                              | A) Yes* | A) Study reports age and sex*<br>B) Study reports demographic details, types of stroke and risk factors | A) Independent assessment* | A) Yes (1 year)*  | B) Subjects lost to follow-up unlikely to introduce bias - small number lost to follow-up 22 (5%)* |

|                       |                                                                                                                                                |                                   |                                                                                                  |         |                                                                                                         |                            |                  |                                                                                                    |
|-----------------------|------------------------------------------------------------------------------------------------------------------------------------------------|-----------------------------------|--------------------------------------------------------------------------------------------------|---------|---------------------------------------------------------------------------------------------------------|----------------------------|------------------|----------------------------------------------------------------------------------------------------|
| Matenga et al. 1997   | B) Somewhat representative of the average population of Harare, Zimbabwe. (stroke patients unable to attend hospital may be underrepresented)* | A) Drawn from the same community* | A) Secure records (hospital records, postmortem register, monthly hospital discharge summaries)* | A) Yes* | A) Study reports age and sex*                                                                           | A) Independent assessment* | A) Yes (1 year)* | A) Complete follow-up - all subjects accounted for*                                                |
| Nakibuuka et al. 2015 | C) Selected group from Mulago national referral and teaching hospital, city Kampala, Uganda                                                    | A) Drawn from the same community* | A) Secure record*                                                                                | A) Yes* | A) Study reports age and sex*<br>B) Study reports demographic details, types of stroke and risk factors | A) Independent assessment* | B) No (6 months) | B) Subjects lost to follow-up unlikely to introduce bias - small number lost to follow-up 2 (2%)*  |
| Nkoike et al. 2015    | C) Selected group from Yaounde Central Hospital and the Yaounde General Hospital Yaounde, Cameroon                                             | A) Drawn from the same community* | A) Secure record and patient/relative interviews*                                                | A) Yes* | A) Study reports age and sex*<br>B) Study reports demographic details, types of stroke and risk factors | A) Independent* assessment | A) Yes (1 year)* | B) Subjects lost to follow-up unlikely to introduce bias - small number lost to follow-up 10 (4%)* |
| Okung's et al. 2016   | C) Selected group from Muhimbili National Hospital,                                                                                            | A) Drawn from the same community* | A) Secure record and verbal autopsy*                                                             | A) Yes* | A) Study reports age and sex*<br>B) Study reports demographic                                           | A) Independent assessment* | B) No (6 months) | B) Subjects lost to follow-up unlikely to introduce bias - small                                   |

|                         | Dar es Salaam,<br>Tanzania                                                                                                                                                                                                 |                                   |                                                                                                                                             |         | details, types of<br>stroke and risk<br>factors                                                         |                                    |                   | number lost to<br>follow-up 38 (17%)*                                                             |
|-------------------------|----------------------------------------------------------------------------------------------------------------------------------------------------------------------------------------------------------------------------|-----------------------------------|---------------------------------------------------------------------------------------------------------------------------------------------|---------|---------------------------------------------------------------------------------------------------------|------------------------------------|-------------------|---------------------------------------------------------------------------------------------------|
| Okon et al. 2015        | B) Somewhat representative of the average population of Akure South Local Government and Akure North Local Government Areas in Ondo State (females and stroke patients unable to attend* hospital may be underrepresented) | A) Drawn from the same community* | A) Secure record (Clinical notes, admission records, discharge lists, notifications from private family physicians and death certificates)* | A) Yes* | A) Study reports age and sex*                                                                           | A) Independent blinded assessment* | A) Yes (1 year)*  | A) Complete follow-up - all subjects accounted for*                                               |
| Walker et al. 2011      | A) Truly representative of the average population of 52 villages in the Hai district of northern Tanzania*                                                                                                                 | A) Drawn from the same community* | A) Secure record (the Tanzanian Stroke Incidence Project (TSIP) combined with verbal autopsy*                                               | A) Yes* | A) Study reports age and sex*                                                                           | A) Independent assessment*         | A) Yes (3 years)* | B) Subjects lost to follow-up unlikely to introduce bias - small number lost to follow-up*        |
| Garbusinski et al. 2005 | C) Selected group from The Royal Victoria Teaching Hospital (RVTH), Banjul, The Gambia                                                                                                                                     | A) Drawn from the same community* | A) Secure record*                                                                                                                           | A) Yes* | A) Study reports age and sex*<br>B) Study reports demographic details, types of stroke and risk factors | A) Independent assessment*         | A) Yes (1 year)*  | B) Subjects lost to follow-up unlikely to introduce bias - small number lost to follow-up 5 (3%)* |

|                    |                                                                                                                                                               |                                   |                                                                                                |         |                               |                   |                   |                                                                                            |
|--------------------|---------------------------------------------------------------------------------------------------------------------------------------------------------------|-----------------------------------|------------------------------------------------------------------------------------------------|---------|-------------------------------|-------------------|-------------------|--------------------------------------------------------------------------------------------|
| Walker et al. 2010 | A) Truly representative of the average population of the 8 geographical divisions in Dar-es Salaam and each of the 52 villages in the Hai district, Tanzania* | A) Drawn from the same community* | A) Secure record (the Tanzanian Stroke Incidence Project (TSIP) combined with verbal autopsy)* | A) Yes* | A) Study reports age and sex* | D) No description | A) Yes (3 years)* | B) Subjects lost to follow-up unlikely to introduce bias - small number lost to follow-up* |
|--------------------|---------------------------------------------------------------------------------------------------------------------------------------------------------------|-----------------------------------|------------------------------------------------------------------------------------------------|---------|-------------------------------|-------------------|-------------------|--------------------------------------------------------------------------------------------|

---

Supplementary Table 2. A summary of the epidemiological data from stroke studies in Africa

| Study and publication year | No. of cases of stroke identified | Imaging available N (%) | Stroke type N (%)                        | Mean age (years) Mean (SD) | Female N (%) | Crude annual incidence <sup>†</sup> N (95% CI)  | Sex-disaggregated incidence rate <sup>†</sup> |                    | Age-adjusted incidence <sup>†</sup> N (95% CI)   | Crude prevalence <sup>†</sup> N (95% CI) | Age-adjusted prevalence <sup>†</sup> N (95% CI) | One-month case fatality % (95% CI) |
|----------------------------|-----------------------------------|-------------------------|------------------------------------------|----------------------------|--------------|-------------------------------------------------|-----------------------------------------------|--------------------|--------------------------------------------------|------------------------------------------|-------------------------------------------------|------------------------------------|
|                            |                                   |                         |                                          |                            |              |                                                 | Males N (95% CI)                              | Females N (95% CI) |                                                  |                                          |                                                 |                                    |
| Ashok et al. 1986          | 329                               | 264 (80)                | IS 266 (81)<br>ICH 63 (19)               | NS                         | 145 (44)     | 63 (57-70*)                                     | 69 (59-79)*                                   | 58 (48-57)*        | NS                                               | NS                                       | NS                                              | 17 (13-21)*                        |
| Damasceno et al. 2010      | 651                               | 540 (83)                | IS 351 (58)<br>ICH 242 (40)<br>SAH 8 (1) | 59.1 (13)                  | 309 (48)     | 148 (NS)                                        | NS                                            | NS                 | 260 (NS)<br>WHO                                  | NS                                       | NS                                              | 50 (44-56)                         |
| Danesi et al. 2013         | 189                               | 71 (38)                 | NS                                       | 58.5 (13)                  | 71 (38)      | 25 (22–29)                                      | 28 (23-33)*                                   | 21 (16-26)*        | 54 (49-59)<br>WHO                                | NS                                       | NS                                              | 16 (10-22)*                        |
| El-Tallawy et al. 2013     | 130                               | 130 (100)               | IS 116 (89)<br>ICH 12 (9)<br>SAH 2 (2)   | NS                         | 48 (37)      | 181 (122–241)                                   | 212 (121-302)                                 | 151 (75-227)       | NS                                               | 655 (543-761)                            | NS                                              | NS                                 |
| Farghaly et al. 2013       | 156                               | 156 (100)               | NS                                       | NS                         | 70 (45)      | 250 (210-288*)                                  | 270 (211-324)*                                | 230 (176-284)*     | NS                                               | 560 (NS)                                 | NS                                              | NS                                 |
| Matenga et al. 1997        | 273                               | 0 (0)                   | NS                                       | NS                         | 131 (48)     | 31 (27-34)                                      | 30 (NS)                                       | 32 (NS)            | 68 (NS)<br>WHO                                   | NS                                       | NS                                              | NS                                 |
| Okon et al. 2015           | 298                               | NS                      | NS                                       | NS                         | 114 (38)     | 61 (54-68)                                      | NS                                            | NS                 | 61 (NS)                                          | NS                                       | NS                                              | 4 (2-6)*                           |
| Walker et al. 2010         | 636                               | 223 (35)                | NS                                       | NS                         | 216 (34)     | Hai: 95 (76-115)<br>Dar-es-Salaam: 108 (88-130) | NS                                            | NS                 | Hai:109 (89-131)<br>Dar-es-Salaam: 316 (282-352) | NS                                       | NS                                              | NS                                 |
| Nakibuuka et al. 2015      | 127                               | 127 (100)               | IS 88 (69)<br>ICH 39 (31)                | NS                         | 68 (54)      | NS                                              | NS                                            | NS                 | NS                                               | NS                                       | NS                                              | 27 (18-36)*                        |

|                            |     |          |                                          |         |          |    |    |    |    |    |    |             |
|----------------------------|-----|----------|------------------------------------------|---------|----------|----|----|----|----|----|----|-------------|
| Gomes et al.<br>2013       | 651 | 601 (92) | IS 351 (58)<br>ICH 242 (40)<br>SAH 8 (1) | NS      | NS       | NS | NS | NS | NS | NS | NS | 43 (40-48)* |
| Nkoke et al.<br>2015       | 254 | 231 (91) | IS 162 (64)<br>ICH 69 (27)<br>UD 23 (9)  | 62 (13) | 119 (47) | NS | NS | NS | NS | NS | NS | 23 (17-29)* |
| Okeng'o et al.<br>2016     | 186 | NS       | IS 125 (67)<br>ICH 61 (33)               | 62 (15) | 94 (51)  | NS | NS | NS | NS | NS | NS | 33 (25-41)* |
| Walker et al.<br>2011      | 453 | 63 (14)  | NS                                       | NS      | NS       | NS | NS | NS | NS | NS | NS | 27 (19-35)  |
| Garbusinski et<br>al. 2005 | 148 | 0 (0)    | IS 42 (30)<br>ICH 63 (46)<br>UD 33 (24)  | NS      | 75 (51)  | NS | NS | NS | NS | NS | NS | 46 (35-81)* |

†: Estimates were reported in 100,000/person-years; N: no of events; CI: confidence interval;

NS Not stated;

IS: Ischaemic Stroke; ICH: Intracerebral Haemorrhage; UD: undefined stroke type; SD: Standard Deviation; WHO: World Health Organization;

\*Calculated manually based on information in the article



Supplementary Table 3: **Meta-regression results of stroke incidence studies**

|                    | Estimate            | SE     | Z-value | <i>P</i> -value | Confidence interval |        |
|--------------------|---------------------|--------|---------|-----------------|---------------------|--------|
|                    |                     |        |         |                 | lower               | upper  |
| intercept          | 3.1537              | 0.3467 | 9.0956  | <.0001          | 2.4741              | 3.8332 |
| Follow-up (months) | 0.0690 <sup>†</sup> | 0.0141 | 4.9061  | <.0001          | 0.0414              | 0.0966 |

SE; standard error

<sup>†</sup>: the coefficient (0.0966) is in the log scale
